# Supplementary material for: Association between Dietary Habits and Helicobacter pylori Infection among Bahraini Adults
Source: MDPI journal article supplement (doi:10.3390/nu14194215), 2022-10-10
Supplement: s1 [file s1]

**Table S1.** Frequencies and distribution of *H. pylori* diagnostic methods used.

| Parameter                     | <i>n</i> | %    |
|-------------------------------|----------|------|
| <b>Diagnostic method used</b> |          |      |
| Urea breath test              | 71       | 35.5 |
| Gastric biopsy testing        | 102      | 51.0 |
| Both                          | 27       | 13.5 |

**Table S2.** Percent distribution of frequency of consumption of food and beverage items by the study participants.

| Food                  | <1 time per month/None<br><i>n</i> (%) | 1–2 times/month<br><i>n</i> (%) | 1–2 times/week<br><i>n</i> (%) | 3–4 times/week<br><i>n</i> (%) | Every Day<br><i>n</i> (%) |
|-----------------------|----------------------------------------|---------------------------------|--------------------------------|--------------------------------|---------------------------|
| Grains                | 4 (2.0)                                | 1 (0.5)                         | 12 (6.0)                       | 23 (11.5)                      | 160 (80.0)                |
| Green vegetable       | 9 (4.5)                                | 14 (7.0)                        | 33 (16.5)                      | 30 (15.0)                      | 114 (57.0)                |
| Tuberous vegetables   | 6 (3.0)                                | 18 (9.0)                        | 41 (20.5)                      | 43 (21.5)                      | 92 (46.0)                 |
| Fish                  | 16 (8.0)                               | 30 (15.0)                       | 111 (55.5)                     | 39 (19.5)                      | 4 (2.0)                   |
| Chicken               | 8 (4.0)                                | 6 (3.0)                         | 49 (24.5)                      | 85 (42.5)                      | 52 (26.0)                 |
| Red meat              | 34 (17.0)                              | 45 (22.5)                       | 100 (50.0)                     | 19 (9.5)                       | 2 (1.0)                   |
| Sausage               | 171 (85.5)                             | 18 (9.0)                        | 7 (3.5)                        | 4 (2.0)                        | 0 (0.0)                   |
| Hot dog               | 179 (89.5)                             | 16 (8.0)                        | 4 (2.0)                        | 1 (0.5)                        | 0 (0.0)                   |
| Salami or ham         | 178 (89.0)                             | 15 (7.5)                        | 4 (2.0)                        | 2 (1.0)                        | 1 (0.5)                   |
| Hamburger             | 101 (50.5)                             | 56 (28.0)                       | 35 (17.5)                      | 6 (3.0)                        | 2 (1.0)                   |
| Milk                  | 50 (25.0)                              | 22 (11.0)                       | 27 (13.5)                      | 26 (13.0)                      | 75 (37.5)                 |
| Yogurt                | 30 (15.0)                              | 24 (12.0)                       | 48 (24.0)                      | 37 (18.5)                      | 61 (30.5)                 |
| Salty Cheese          | 29 (14.5)                              | 18 (9.0)                        | 42 (21.0)                      | 37 (18.5)                      | 74 (37.0)                 |
| Fresh Fruits          | 6 (3.0)                                | 15 (7.5)                        | 36 (18.0)                      | 30 (15.0)                      | 113 (56.5)                |
| Legumes               | 43 (21.5)                              | 49 (24.5)                       | 76 (38.0)                      | 23 (11.5)                      | 9 (4.5)                   |
| Eggs                  | 18 (9.0)                               | 19 (9.5)                        | 82 (41.0)                      | 40 (20.0)                      | 41 (20.5)                 |
| Nuts and dried fruits | 41 (20.5)                              | 35 (17.5)                       | 51 (25.5)                      | 31 (15.5)                      | 42 (21.0)                 |
| Salted fish           | 151 (75.5)                             | 29 (14.5)                       | 15 (7.5)                       | 4 (2.0)                        | 1 (0.5)                   |
| Pickled vegetables    | 127 (63.5)                             | 28 (14.0)                       | 31 (15.5)                      | 4 (2.0)                        | 10 (5.0)                  |
| Onion                 | 28 (14.0)                              | 11 (5.5)                        | 36 (18.0)                      | 29 (14.5)                      | 96 (48.0)                 |
| Garlic                | 43 (21.5)                              | 12 (6.0)                        | 28 (14.0)                      | 30 (15.0)                      | 87 (43.5)                 |
| Tomato                | 20 (10.0)                              | 13 (6.5)                        | 28 (14.0)                      | 30 (15.0)                      | 109 (54.5)                |
| Butter and ghee       | 98 (49.0)                              | 30 (15.0)                       | 38 (19.0)                      | 17 (8.5)                       | 17 (8.5)                  |
| Vegetable oils        | 7 (3.5)                                | 13 (6.5)                        | 21 (10.5)                      | 23 (11.5)                      | 136 (68.0)                |
| Deserts               | 40 (20.0)                              | 36 (18.0)                       | 67 (33.5)                      | 12 (6.0)                       | 45 (22.5)                 |
| Tea                   | 28 (14.0)                              | 14 (7.0)                        | 24 (12.0)                      | 14 (7.0)                       | 120 (60.0)                |
| Green tea             | 135 (67.5)                             | 21 (10.5)                       | 22 (11.0)                      | 7 (3.5)                        | 15 (7.5)                  |
| Coffee                | 60 (30.0)                              | 22 (11.0)                       | 37 (18.5)                      | 13 (6.5)                       | 68 (34.0)                 |
| Soft drinks           | 117 (58.5)                             | 24 (12.0)                       | 30 (15.0)                      | 12 (6.0)                       | 17 (8.5)                  |
| Honey                 | 76 (38.0)                              | 38 (19.0)                       | 28 (14.0)                      | 20 (10.0)                      | 38 (19.0)                 |
